# Supplementary material for: Jamming and unjamming of concentrated colloidal dispersions in channel flows
Source: Royal Society of Chemistry journal article supplement (doi:10.1039/c0sm00110d), 2010-01-01
Supplement: c0sm00110d.pdf [file c0sm00110d.pdf]

## Details of ESI: Movie Files available by Download

### 1. movie\_1.avi

- Particle concentration:  $\phi = 0.505$
- Pump speed ( $\equiv$ applied pressure):  $v_2 = 0.612 \text{ ml min}^{-1}$

This movie shows a sub-set of the sequence of images recorded. The images have been cropped to show a small section of the frame containing the lower part of the entrance to the capillary. The movie starts a few seconds after the vortices have formed. Tracer/dust particles can clearly be seen circulating in a clockwise direction near the capillary entrance.

### 2. movie\_2.avi

- Particle concentration:  $\phi = 0.52$
- Pump speed ( $\equiv$ applied pressure):  $v_2 = 0.612 \text{ ml min}^{-1}$

This movie shows a sub-set of the sequence of images recorded. The images have been cropped to show a small section of the frame containing the upper part of the entrance to the capillary. The movie starts a few seconds after the vortices have formed. Tracer/dust particles can clearly be seen circulating in a anti-clockwise direction near the capillary entrance. At this particle concentration the recirculation zone is larger than at  $\phi = 0.505$  and is not fully observable in this movie.
